# Supplementary material for: Effects of Differential Strategies of Emotion Regulation
Source: PubMed Central journal article supplement (PMC6769771; doi:10.3390/brainsci9090225), 2019-09-05
Supplement: brainsci-09-00225-s001.pdf [file brainsci-09-00225-s001.pdf]

Supplementary Table S1: Post-hoc-t-values for LPP mean amplitude.

| Time Window | ER      | VIEW               | VIEW          | VIEW               | REAPPRAISAL   | REAPPRAISAL        | ACCEPT             |
|-------------|---------|--------------------|---------------|--------------------|---------------|--------------------|--------------------|
|             | Emotion | vs.<br>REAPPRAISAL | vs.<br>ACCEPT | vs.<br>SUPPRESSION | vs.<br>ACCEPT | vs.<br>SUPPRESSION | vs.<br>SUPPRESSION |
| 300–500     | anxiety | 3.45**             | 3.34**        | 0.89               | 0.58          | 1.75               | 2.76*              |
|             | sad     | 0.77               | 1.16          | 1.82               | 0.19          | 0.82               | 0.76               |
| 500–700     | anxiety | 2.79*              | 2.67*         | 0.61               | 0.28          | 2.23               | 2.09               |
|             | sad     | 0.15               | 0.35          | 2.14               | 0.16          | 1.35               | 1.49               |
| 700–900     | anxiety | 0.92               | 1.51          | 0.36               | 0.43          | 0.49               | 1.16               |
|             | sad     | 2.18               | 1.51          | 2.08               | 0.75          | 0.53               | 0.13               |
| 900–1100    | anxiety | 0.58               | 3.55**        | 0.77               | 2.92*         | 1.18               | 1.94               |
|             | sad     | 2.13               | 0.89          | 1.85               | 1.40          | 0.36               | 0.92               |
| 1100–1300   | anxiety | 0.33               | 3.33*         | 1.04               | 2.45          | 0.76               | 1.78               |
|             | sad     | 2.46               | 1.64          | 1.53               | 1.33          | 1.62               | 0.21               |
| 1300–1500   | anxiety | 0.07               | 1.97          | 1.30               | 1.75          | 1.06               | 0.52               |
|             | sad     | 2.11               | 1.69          | 0.81               | 1.21          | 2.25               | 0.74               |
| 1500–1700   | anxiety | 0.21               | 1.74          | 0.87               | 1.02          | 0.58               | 0.52               |
|             | sad     | 1.43               | 0.59          | 1.69               | 0.94          | 0.13               | 0.82               |

The t-values of the post-hoc-t-tests were depicted for LPP mean amplitude for anxiety- and sadness-inducing pictures for the used time windows. \*  $p(\text{FDR}) < .05$ ; \*\*  $p(\text{FDR}) < .01$ .
